# **A simple genetic basis for managing maternally transmitted symbionts**

Lisa J. Funkhouser-Jones<sup>1,2,6\*</sup>, Edward J. van Opstal<sup>1,6\*</sup>, Ananya Sharma<sup>1</sup> and Seth R. Bordenstein<sup>1,3,4,5,7\*</sup>

<sup>1</sup> Department of Biological Sciences, Vanderbilt University, Nashville, TN 37235, USA.

<sup>2</sup> Department of Molecular Microbiology, Washington University School of Medicine in St. Louis, Saint Louis, MO 63110, USA.

<sup>3</sup> Department of Pathology, Microbiology, and Immunology, Vanderbilt University, Nashville, TN 37235, USA.

<sup>4</sup> Vanderbilt Institute for Infection, Immunology and Inflammation, Vanderbilt University, Nashville, TN 37235, USA.

<sup>5</sup> Vanderbilt Genetics Institute, Nashville, TN 37235, USA.

<sup>6</sup> These authors contributed equally to this work.

<sup>7</sup> Lead contact

\* Corresponding authors. Email: [s.bordenstein@vanderbilt.edu](mailto:s.bordenstein@vanderbilt.edu) (SRB),

[lisa.j.funkhouser@gmail.com](mailto:lisa.j.funkhouser@gmail.com) (LJF), [edward.j.van.opstal@vanderbilt.edu](mailto:edward.j.van.opstal@vanderbilt.edu) (EjvO)

# SUMMARY

Maternal transmission of intracellular microbes is pivotal in establishing long-term, intimate symbioses. For germline microbes that exert negative reproductive effects on their hosts, selection can theoretically favor the spread of host genes that counteract the microbe's harmful effects. Here, we leverage a major difference in bacterial (*Wolbachia pipientis*) titers between closely-related wasp species with forward genetic, transcriptomic, and cytological approaches to map two quantitative trait loci that suppress bacterial titers via a maternal effect. Fine mapping and knockdown experiments identify the gene *Wolbachia density suppressor* (*Wds*), which dominantly suppresses bacterial transmission from mother to embryo. *Wds* evolved by lineage-specific amino acid changes driven by positive selection. Collectively, our findings demonstrate that a genetically simple change arose by Darwinian selection in less than a million years to regulate maternally transmitted bacteria via a dominant, maternal effect gene.

# INTRODUCTION

All animals harbor microbial communities that participate in beneficial processes [1] as diverse as nutritional uptake and metabolism [2, 3], immune cell development [4-6], and pathogen resistance [7, 8]. However, even innocuous microbes can become harmful when not properly regulated [9, 10], and intracellular microbes that are transmitted over multiple host generations can have negative fitness effects on their hosts [11-13]. In these intimate and enduring germline symbioses, hosts are predicted to evolve suppression that reduces the harmful effects of the symbiont [14-16]. However, little is known about the genes and evolutionary forces that underpin regulation of maternally-transmitted symbionts despite the repeated and independent origins of maternal transmission in diverse host taxa [17]. Reverse genetic studies in insects suggest immune or developmental genes may evolve to affect endosymbiont densities [18-21] but, to our knowledge, no studies have utilized forward genetic approaches to characterize the gene(s) underlying variation in host regulation of maternally-transmitted symbionts.

Here, we utilize a major host interspecific difference in titers of the maternally-transmitted bacteria *Wolbachia* and quantitative trait loci analyses to identify a suppressor gene in the emerging *Nasonia* model. *Nasonia* (Order: Hymenoptera) is a genus of parasitoid wasps comprised of four closely-related species, with *N. vitripennis* last sharing a common ancestor with the other three species approximately one million years ago [22, 23]. In the lab, interspecific crosses of *Nasonia* species produce viable and fertile hybrid females, which permits the transfer of genetic or cytoplasmic material (including intracellular *Wolbachia*) between *Nasonia* species. Consequently, *Nasonia* is a powerful model system for studying the quantitative genetics of interspecific variation in host traits such as wing size [24-26], head shape [27], sex pheromones [28, 29], and memory retention [30].

*Nasonia* species are all naturally infected with different *Wolbachia* strains, mostly acquired through horizontal transfer after species divergence [31]. *Wolbachia* (Order Rickettsiales) are vertically-transmitted, intracellular bacteria that infect 40-52% of all arthropod species [32, 33]. In most insects, including in *Nasonia*, *Wolbachia* are reproductive parasites that manipulate host reproduction through a variety of mechanisms to achieve a greater proportion of females in the host population [34, 35]. Both efficient transovarial transmission and host reproductive manipulation by the parasite often depend upon sufficiently high within-host *Wolbachia* densities [36, 37]; however, overproliferation of *Wolbachia* can drastically reduce lifespan in *Drosophila* [13, 38], mosquitoes [39, 40] and terrestrial isopods [41]. Thus, coadaptation between arthropod hosts and *Wolbachia* strain(s) can promote genetic and phenotypic changes that impact transmission of *Wolbachia* densities [42-47]. When co-adapted host and symbiont pairs are disrupted through experimental transfer of *Wolbachia* into a naïve host, control of the symbiosis is often lost, leading to overproliferation, expanded tissue tropism of *Wolbachia*, and/or fitness costs not witnessed in the original host species [41, 47-49].

Transfer of a specific *Wolbachia* strain (*wVitA*) from one *Nasonia* species (*N. vitripennis*) to a naïve, closely-related species (*N. giraulti*) results in a major perturbation in which the relative *Wolbachia* load increases by two orders of magnitude with an associated reduction in fecundity [47]. Importantly, *wVitA* densities and *Nasonia* fecundity return to normal when *wVitA* is crossed back into a *N. vitripennis* genomic background from the high-density *N. giraulti* line (IntG). Since both the native *N. vitripennis* and the *wVitA*-infected *N. giraulti* IntG lines have the same cytotype, the interspecific *Wolbachia* density variation is established by variation in the host nuclear genome [47]. In this study, we utilize several forward genetic techniques in *Nasonia* to dissect the genetic, evolutionary, and cytological basis of maternal regulation of *Wolbachia*. The varied approaches

culminate in the characterization of two quantitative trait loci and the discovery of *Wolbachia* density suppressor (*Wds*), a positively-selected, maternal effect gene that suppresses the transmission of *Wolbachia*.

## RESULTS

### *Nasonia vitripennis* dominantly suppresses *wVitA* titers through a maternal genetic effect

To determine the inheritance pattern of *wVitA* densities, we reciprocally crossed *N. vitripennis* (low-density) and *N. giraulti* IntG (high-density) individuals and measured the *Wolbachia* densities of F1 female hybrids using quantitative PCR (qPCR) for a single-copy *Wolbachia* gene (*groEL*) normalized to a *Nasonia* gene (*NvS6K*) (Figure 1A). The average F1 female pupal *Wolbachia* densities from pure-breeding *N. vitripennis* (N = 5) and *N. giraulti* control families (N = 5) were  $0.057 \pm 0.004$  and  $4.805 \pm 1.071$  (mean  $\pm$  S.E.M.), respectively, which represents an 84-fold interspecific difference in *Wolbachia* titers and is consistent with previous studies [47]. Interestingly, while F1 hybrid females from both crosses had identical genotypes (i.e., heterozygous at all loci) and cytotypes (*N. vitripennis*), the average *Wolbachia* densities in reciprocal F1 hybrid females were significantly different at  $0.149 \pm 0.029$  vs  $1.746 \pm 0.187$  (Figure 1A, N = 10 for both crosses, Kruskal-Wallis test:  $H = 24.99$ ,  $df = 3$ ,  $p < 0.0001$ , Dunn's multiple comparisons test:  $p = 0.03$ ).

To test whether the difference in F1 *Wolbachia* densities was due to maternal *Wolbachia* load or to a maternal genetic effect, we backcrossed F1 females to their paternal line and pooled five female F2 pupae per F1 mother for qPCR (Figure 1B). If a maternal genetic effect regulates *Wolbachia* densities, F2 pupae from both experimental lines should have similar *Wolbachia* levels since F1 hybrid mothers are genotypically identical. Indeed, the densities of F2 pupal offspring of both high- and low-density F1 mothers (F2-2 and F2-1, respectively) were not significantly

different (Figure 1B,  $0.161 \pm 0.024$ ,  $N = 13$  and  $0.086 \pm 0.007$ ,  $N = 14$ , respectively, Dunn's multiple comparisons test:  $p = 0.18$ ), supporting the inference that maternal nuclear genotype plays an important role in regulating *Wolbachia* densities. Furthermore, since the densities of both F2 hybrid groups were more similar to the *N. vitripennis* control ( $0.053 \pm 0.001$ ,  $N = 6$ ) than to the *N. giraulti* control ( $3.364 \pm 0.174$ ,  $N = 6$ ), the *N. vitripennis* low *Wolbachia* density phenotype is dominant (Figure 1B).

# **Disparities in embryonic wVitA levels between *N. vitripennis* and *N. giraulti* are established during oogenesis**

We previously showed that variation in wVitA loads between *N. vitripennis* and *N. giraulti* IntG exists in early embryos, with strict posterior localization of wVitA in *N. vitripennis* that is perturbed in *N. giraulti* IntG embryos [47]. Since the wVitA density disparity is partially controlled through a maternal genetic effect (Figure 1B), we reasoned that an embryonic disparity in wVitA densities between *N. vitripennis* and *N. giraulti* is likely established in the egg chamber during oogenesis (Figure 1C). Indeed, nucleic acid staining with SYTOX Green revealed that fewer wVitA cells are present in stage three *N. vitripennis* egg chambers (Figure 1D) than in *N. giraulti* oocytes at the same stage (Figure 1E). Furthermore, wVitA cells in *N. vitripennis* are distributed equally between the oocyte and nurse cells (Figure 1D), whereas most wVitA cells in *N. giraulti* egg chambers are present in the oocyte (Figure 1E). Once in the oocyte, wVitA localizes exclusively to the posterior pole in *N. vitripennis* (Figure 1D), but has an expanded distribution toward the anterior end of the oocyte in *N. giraulti* (Figure 1E). Importantly, the lack of puncta in ovaries from uninfected *N. vitripennis* confirms that the SYTOX nucleic acid dye effectively stains *Wolbachia* but no other cytoplasmic elements, such as mitochondria (Figure 1F). Altogether, the

distribution and density of *wVitA* in oocytes of these two *Nasonia* species perfectly mirror their embryonic *wVitA* patterns [47], suggesting that *Wolbachia* density differences are established during oogenesis and regulated through maternal-effect genes, rather than zygotic genes expressed later in embryonic development.

## **Phenotype-based selection and introgression identifies two maternal suppressor genomic regions**

In an initial approach to determine the location and number of loci that suppress *wVitA* densities in *N. vitripennis*, we selected upon the dominant, low-density phenotype of this species while serially backcrossing hybrid females to *N. giraulti* IntG males (Figure 2A). Since the phenotype is controlled through a maternal genetic effect, hybrid females were selected based on the *wVitA* densities of their offspring, with sisters of the low-density offspring used as mothers in the next round of introgression (Figure 2A). Two independent selection lines were generated simultaneously to help discriminate between *N. vitripennis* regions maintained due to selection (present in both lines) versus those maintained through chance (present in only one line).

For each independent line, DNA from three females that produced ninth-generation offspring with the lowest *Wolbachia* densities were pooled and genotyped on a *Nasonia* genotyping microarray composed of 19,681 sequence markers that differ between *N. vitripennis* and *N. giraulti* [50]. Both selection lines (Lines 1 and 2) displayed an enrichment of *N. vitripennis* alleles along the central portions of chromosomes 2 and 3 (Figure 2B) out of *Nasonia*'s five chromosomes. On the most recent *N. vitripennis* linkage map [50], the area of enrichment on chromosome 2 for Line 1 occurs between 38 cM and 51.1 cM, while enrichment in Line 2 extends from 25.6 cM to 38 cM (Figure 2B). Although overlap in *N. vitripennis* allele enrichment between

Lines 1 and 2 on chromosome 2 occurs at 38 cM, the exact position and size of the overlap cannot be determined due to the fact that it falls within the poorly-assembled heterochromatic regions flanking the centromere [50]. For chromosome 3, the areas of enrichment for *N. vitripennis* alleles between Lines 1 and 2 coincide starting at 35 cM and ending at 47.5 cM.

## QTL analysis validates the two maternal effect suppressor regions

To validate the *Wolbachia* density-suppressing chromosomal regions determined through phenotypic selection, we performed an independent quantitative trait loci (QTL) analysis in which F1 hybrid females were backcrossed to high-density *N. giraulti* (IntG) males to obtain 191 F2 recombinant females. Each F2 female was phenotyped by measuring the *Wolbachia* densities of her F3 pupal offspring. Since the most informative individuals in QTL mapping are those with the most extreme phenotypes [51], we selectively genotyped F2 females with the lowest (0.072 – 0.409, N = 42) and highest (2.958 – 10.674, N = 42) F3 pupal *Wolbachia* titers with a total of 47 microsatellite markers across chromosomes 1, 2 and 3 with an average distance between markers of 3 cM (Table S1). Using genotype data for selected individuals and phenotype data for all F2 females (Data S1), we identified two significant QTL regions at a genome-wide significance level of  $\alpha = 0.05$  (LOD > 2.29): one QTL peak on chromosome 2 at 43 cM ( $p < 0.001$ ) and the other on chromosome 3 at 41.5 cM ( $p < 0.001$ ) (Figure 2C). Strikingly, the 95% Bayes credible interval on chromosome 2 corresponds to the same region identified by the genotyping microarray as enriched for *N. vitripennis* alleles in introgression Line 1 (38 cM – 51.1 cM), while the 95% Bayes credible interval on chromosome 3 also contains a region that was enriched for *N. vitripennis* alleles (35 cM – 47.5 cM) in both introgression lines. Thus, the microarray and QTL analyses complement



each other and confirm that suppressor genes of major effect for *w*VitA density are located near the centromeric regions on chromosomes 2 and 3.

As a negative control, we genotyped the same individuals with markers located on *Nasonia* chromosome 1 (Data S1), which was not enriched for *N. vitripennis* alleles after the selection introgression. In the QTL analysis, the highest peak on chromosome 1 was not statistically significant (Figure 2C), indicating again that chromosomes 2 and 3 are likely the only chromosomes harboring genes of major effect for the *w*VitA density trait.

To determine the effect of each QTL on density suppression, the average percent reduction in F3 pupal *Wolbachia* densities was calculated for the F2 females with *N. vitripennis* alleles at markers close to one or both of the calculated QTL peaks. Females with an *N. vitripennis* allele on the chromosome 2 or chromosome 3 QTLs produced offspring with a 52% or 32% reduction in densities, respectively, compared to offspring of females that were homozygous *N. giraulti* at both QTL loci (Figure 2C, inset). Furthermore, these effects acted additively for a 91% reduction in densities in offspring of females with *N. vitripennis* alleles at both loci compared to offspring of F2 females with *N. giraulti* alleles at both loci (Figure 2C, inset).

### **Marker-assisted introgression confirms and narrows the maternal effect suppressor QTL on chromosome 3**

To validate the QTLs on chromosomes 2 and 3 and narrow the gene candidate regions, we independently introgressed the QTL regions from *N. vitripennis* into an *N. giraulti* IntG background for at least nine generations using marker-assisted selection (similar to Figure 2A, see Materials and Methods). After the ninth generation, we conducted sibling matings to produce segmental introgression lines that were homozygous *N. vitripennis* for the marker of interest.

Unfortunately, generating *N. vitripennis* homozygous lines for the chromosome 2 region was not possible due to hybrid sterility, so we focused exclusively on the chromosome 3 region.

The initial homozygous and heterozygous introgression lines generated from sibling matings identified a candidate region 3.4 Mb in size containing 288 genes (Line IntC3) that suppressed *wVitA* densities by 60%, while lines lacking this region had little to no density suppression (Figure 3, Data S2). Surprisingly, the percent effect of the chromosome 3 homozygous introgression on *Wolbachia* suppression was nearly double that observed in the QTL study (60% vs 32%, Figure 2C inset). However, the QTL study was performed on F2 hybrid females while the introgression lines underwent at least nine generations of backcrossing. If there was an *N. vitripennis*-specific negative regulator of the *Wolbachia* suppressor gene on a different chromosome, then the allele would likely be present in F2 hybrids but would have recombined out with subsequent backcrossing to *N. giraulti* IntG. The stronger phenotype could also be due to the homozygous introgression lines having two copies of the *N. vitripennis* chromosome 3 candidate region, while F2 hybrid females were heterozygous. However, this is unlikely since heterozygous introgression females had the same level of *Wolbachia* suppression as their homozygous counterparts (Fig. 3, C3-3 and C3-4 vs. C3-5 and C3-6, Kruskal-Wallis test:  $H = 1.39$ ,  $df = 3$ ,  $p = 0.71$ ).

IntC3 was further backcrossed to IntG to generate four recombinant lines (R3, R4, R5, and R6) that suppressed *wVitA* densities by 58 – 78% (depending on the line) with an overlapping candidate region of 780 kb and 44 genes (Fig. 3). Finally, R6 was backcrossed to IntG to obtain three recombinant lines, two of which caused 67% (R6-2) and 68% (R6-3) density suppression. The overlapping *N. vitripennis* region in the R6-2 and R6-3 lines was 165 kb and contained only 32 genes (Figure 3).

## RNA-seq identifies a single candidate gene (*Wds*) based on expression differences in *Nasonia* ovaries

To identify candidate genes within the 165 kb, 32-gene region that are differentially expressed in the maternal germline of *N. vitripennis* and *N. giraulti*, we performed high-throughput RNA sequencing (RNA-seq) on four independent pools of 40 ovary samples from the parental *N. vitripennis* 12.1 strain and the IntC3 line from the first round of introgressions as well as five independent pools from the *N. giraulti* IntG line (Table S2). Seven genes in the 32-gene candidate region exhibited significant differences in expression between the three aforementioned lines (Table S3). However, since the density trait is controlled through a dominant *N. vitripennis* maternal effect (Figure 1B), we reasoned that the most likely candidate gene(s) would be upregulated in *N. vitripennis* compared to *N. giraulti*. Only one of the seven genes (*LOC100679092*) was consistently and significantly overexpressed in *N. vitripennis* and IntC3 (low density) compared to IntG (high density). Thus, we focused on *LOC100679092* for further analysis. As an uncharacterized gene with no known protein domains, we hereby name the gene *Wds* for *Wolbachia* density suppressor gene. Overexpression of *Wds* in ovaries of *N. vitripennis* and IntC3 compared to IntG was validated using RT-qPCR (79- and 92-fold, respectively, Figure S1) in independent, biological replicates of the RNA-seq samples.

## *Wds* controls embryonic *w*VitA densities

Several studies have successfully used parental RNAi in *Nasonia* to examine the effects of maternal genes on embryonic development [52-57]. If the *N. vitripennis* allele of *Wds* (*Wds<sub>v</sub>*) is responsible for suppressing *Wolbachia* titers, we expect that post-transcriptional knockdown of

*Wds<sub>v</sub>* transcripts in IntC3 mothers will result in less density suppression and, consequently, an increase in *wVitA* levels in the resulting embryos. Indeed, injection of IntC3 mothers with dsRNA against *Wds<sub>v</sub>* significantly increased offspring embryonic *wVitA* densities ( $696 \pm 67.9$ ,  $N = 24$ ) by 56% or 63% compared to embryonic *wVitA* densities from mothers injected with dsRNA against a control bacterial gene, maltose transporter subunit E (*MalE*) ( $447 \pm 52.1$ ,  $N = 24$ ) or buffer-injected females ( $426 \pm 50.3$ ,  $N = 23$ ), respectively (Figure 4A, Kruskal-Wallis test:  $H = 13.1$ ,  $df = 3$ ,  $p < 0.01$ , Dunn's multiple comparisons test:  $p = 0.006$  and  $p = 0.027$  compared to control *Wds<sub>v</sub>* group). This increase coincided with a 57% knock-down in *Wds<sub>v</sub>* gene expression in RNAi females compared to the buffer-injected controls (Figure 4B, Mann Whitney U test,  $p = 0.0015$ ). Furthermore, we compared embryonic *wVitA* densities from mothers injected with dsRNA against *Nasonia* gene LOC100679394 (*Mucin-5AC*), a gene that was significantly upregulated in *N. vitripennis* but immediately outside the chromosome 3 candidate region. Embryos from mothers injected with dsRNA against *Mucin-5AC* did not produce significantly higher *wVitA* densities ( $459 \pm 75.9$ ,  $N = 25$ ) compared to embryos from either *MalE*-RNAi ( $447 \pm 52.1$ ,  $N = 24$ ) or buffer-injected females ( $426 \pm 50.3$ ,  $N = 25$ , Figure 4A), even though *Mucin-5AC*-RNAi mothers had a 71% decrease in *Mucin-5AC* gene expression versus buffer-injected controls (Figure S2, Mann Whitney U test  $p = 0.0003$ ).

To further validate the effect of *Wds<sub>v</sub>* on *Wolbachia* densities, R6-3 recombinant females (homozygous *N. vitripennis* for the 32-gene candidate region only) were injected with dsRNA against *Wds<sub>v</sub>*. Knock-down of *Wds<sub>v</sub>* in females again significantly increased embryonic *wVitA* densities ( $314 \pm 34.4$ ,  $N = 21$ ) by 43% or 54% compared to embryonic *wVitA* densities from mothers injected with dsRNA against the control bacterial gene *MalE* ( $219 \pm 39.2$ ,  $N = 19$ ) or from buffer-injected females ( $204 \pm 28.4$ ,  $N = 20$ ), respectively (Figure 4C, Mann Whitney U,  $p = 0.049$

and  $p = 0.023$  compared to control *Wds<sub>v</sub>* group). This increase coincided with a 45% knock-down in *Wds<sub>v</sub>* gene expression in RNAi females compared to the buffer-injected controls (Figure 4D, Mann Whitney U test,  $p = 0.0041$ ).

# ***Wds* undergoes accelerated evolution and positive selection**

The *Nasonia* genus is comprised of four closely-related species, with *N. vitripennis* sharing a common ancestor with the other three species approximately one million years ago [22, 23]. *Wds* protein sequences are 95% identical between *N. vitripennis* and *N. giraulti* with ten amino acid differences (and no indels) out of 201 total amino acids (Figure S3). Between the more closely-related *N. giraulti* and *N. longicornis* species that diverged approximately 400,000 years ago [22], *Wds* is 99% identical with two amino acid differences that evolved specifically in *N. giraulti* (Figure S3). Interestingly, *Wds* in *Trichomalopsis sarcophagae*, the wasp species most closely-related to *Nasonia*, [58], shares 95% amino acid identity to the *N. vitripennis* protein, but 97% and 98% identity to the *N. giraulti* and *N. longicornis* proteins, respectively (Figure S3). The accelerated protein sequence evolution in *N. vitripennis* is driven by seven unique amino acid changes that differ from conserved residues present in all three other homologs (Figure 5A, Figure S3) [22]. Furthermore, three of those seven amino acid changes fall within a region of high positive selection based on a sliding window analysis of the  $K_a/K_s$  ratio (Figure 5B) [59]. Additionally, the isoelectric point (pI) of the *Wds* protein, an important factor in protein evolution [60], drops from 9.24 in *N. vitripennis* to 8.75 in *N. giraulti*. In contrast, the isoelectric point difference for the Mucin-5AC control is minimal ( $\Delta pI = 0.04$ ).

Overall, *Wds* in the *N. vitripennis* lineage experienced recent amino acid substitutions, perhaps in response to acquisition of the *wVitA Wolbachia* strain that horizontally transferred into

284 *N. vitripennis* after *N. vitripennis*' divergence from its common ancestor with *N. giraulti* and *N.*  
 285 *longicornis* [31]. Outside of these four species, the next closest orthologs of Wds are found in  
 286 wasps such as *Trichogramma pretiosum*, *Copidosoma floridanum*, and *Polistes canadensis*, but  
 287 they only share 29% – 42% amino acid identity to Wds<sub>v</sub> across a majority of the sequence (Table  
 288 S4). While more distant orthologs are present in other Hymenopterans such as bees and ants (Table  
 289 S4), only portions of the proteins can be properly aligned. Thus, this work demonstrates rapidly  
 290 evolving, taxon-restricted genes can contribute directly to the adaptive evolution of regulating  
 291 maternal symbiont transmission.

## DISCUSSION

The main goal of this study was to determine the number and types of animal gene(s) that control the intracellular abundance of a widespread, maternally-transmitted symbiont. Unlike reverse genetics screens that mutate genes and then look for phenotypes, which may reflect off-target effects of the mutation rather than the true function of the protein, the forward genetic screens deployed here utilized an unbiased, candidate-blind approach to reveal the simple, genetic basis of variation in host regulation of maternally-transmitted *Wolbachia*. The identification of the *Wds* gene demonstrates that host regulation of symbiont loads is adaptive and can proceed through lineage-specific amino acid changes in a maternal effect gene. The *Wds* protein has areas of low complexity and a predicted signal peptide at its N-terminus (Figure 5B), but it does not contain any characterized protein domains that elude to its function. Because *wVitA* bacteria are predominantly found in the oocytes of *N. giraulti* IntG (Figure 2D) but are equally present in the nurse cells and the oocytes of *N. vitripennis* (Figure 2E), we propose that the *Wds* maternal effect that establishes the density difference operates on *wVitA* trafficking between nurse cells and the oocyte in *Nasonia*. Though all *Wolbachia* in *Drosophila* egg chambers are transferred from the nurse cells to the oocyte during cytoplasmic dumping immediately prior to egg-laying [61], *Wolbachia* in *Nasonia* nurse cells appear to be excluded from the oocyte at the end of oogenesis (P. Ferree, personal communication). Thus, the *N. vitripennis* *Wds* allele could function as a molecular inhibitor or physical barrier that impedes *wVitA* trafficking from nurse cells to the oocyte, thereby suppressing *Wolbachia* loads in the resulting embryo. Furthermore, in *Drosophila*, *Wolbachia* *wMel* cells in the oocyte increase proportionally faster than those in the nurse cells [61], which suggests that the high *wVitA* densities in *N. giraulti* could be a combination of

unrestrained shuttling of *w*VitA from the nurse cells into the oocyte as well as faster proliferation of *w*VitA once in the oocyte.

The findings presented here indicate that keeping maternally-transmitted symbionts in check can have a simple genetic basis, even for obligate intracellular bacteria that must be regulated within host cells and tissues. Two genomic regions act additively to explain nearly all of the two-order-magnitude difference in *w*VitA densities between *Nasonia* wasp species. Moreover, a single maternal effect gene with a major consequence on the density phenotype demonstrates how natural selection can rapidly shape the evolution of density suppression of maternally transmitted symbionts in invertebrates.



## ACKNOWLEDGMENTS

We would like to thank John Colbourne for his assistance with the *Nasonia* genotyping microarray, Jürgen Gadau for his helpful advice on QTL mapping, Jack Werren for providing the *Nasonia* genetic map before its publication, and Patrick Ferree for sharing his unpublished data of *Wolbachia* staining in *Nasonia* ovaries. We would also like to acknowledge Jeff Jones for helping with the MatLab heat-map figure. This work was supported by National Science Foundation award 1456778 to SRB and Graduate Research Fellowship 0909667 to LJF, National Institutes of Health awards (NIH) R01 AI132581 and R21 HD086833 to SRB, T32 GM008554, and a Vanderbilt Microbiome Initiative Award. Imaging was performed through the use of the Vanderbilt Cell Imaging Shared Resource (supported by NIH grants CA68485, DK20593, DK58404, DK59637 and EY08126). The funders had no role in study design, data collection and analysis, decision to publish, or preparation of the manuscript.

## AUTHOR CONTRIBUTIONS

Conceptualization, L.J.F., E.J.vO, and S.R.B.; Methodology, L.J.F., E.J.vO, and S.R.B.; Formal Analysis, L.J.F. and E.J.vO; Investigation, L.J.F., E.J.vO, and A.S.; Writing – Original Draft, L.J.F. and E.J.vO; Writing – Review and Editing, L.J.F., E.J.vO, A.S., and S.R.B.; Visualization, L.J.F. and E.J.vO. Project Administration, S.R.B.; Funding Acquisition, L.J.F. and S.R.B.

## DECLARATION OF INTERESTS

The authors declare no competing interests.

# REFERENCES

1. McFall-Ngai, M., Hadfield, M.G., Bosch, T.C., Carey, H.V., Domazet-Lozo, T., Douglas, A.E., Dubilier, N., Eberl, G., Fukami, T., Gilbert, S.F., et al. (2013). Animals in a bacterial world, a new imperative for the life sciences. *Proc Natl Acad Sci U S A* *110*, 3229-3236.
2. Ley, R.E., Turnbaugh, P.J., Klein, S., and Gordon, J.I. (2006). Microbial ecology: human gut microbes associated with obesity. *Nature* *444*, 1022-1023.
3. Turnbaugh, P.J., Ley, R.E., Mahowald, M.A., Magrini, V., Mardis, E.R., and Gordon, J.I. (2006). An obesity-associated gut microbiome with increased capacity for energy harvest. *Nature* *444*, 1027-1031.
4. Round, J.L., Lee, S.M., Li, J., Tran, G., Jabri, B., Chatila, T.A., and Mazmanian, S.K. (2011). The Toll-like receptor 2 pathway establishes colonization by a commensal of the human microbiota. *Science* *332*, 974-977.
5. Ivanov, II, Frutos Rde, L., Manel, N., Yoshinaga, K., Rifkin, D.B., Sartor, R.B., Finlay, B.B., and Littman, D.R. (2008). Specific microbiota direct the differentiation of IL-17-producing T-helper cells in the mucosa of the small intestine. *Cell Host Microbe* *4*, 337-349.
6. Ivanov, II, Atarashi, K., Manel, N., Brodie, E.L., Shima, T., Karaoz, U., Wei, D., Goldfarb, K.C., Santee, C.A., Lynch, S.V., et al. (2009). Induction of intestinal Th17 cells by segmented filamentous bacteria. *Cell* *139*, 485-498.
7. Candela, M., Perna, F., Carnevali, P., Vitali, B., Ciati, R., Gionchetti, P., Rizzello, F., Campieri, M., and Brigidi, P. (2008). Interaction of probiotic *Lactobacillus* and *Bifidobacterium* strains with human intestinal epithelial cells: adhesion properties, competition against enteropathogens and modulation of IL-8 production. *Int J Food Microbiol* *125*, 286-292.

- 367 8. Fukuda, S., Toh, H., Hase, K., Oshima, K., Nakanishi, Y., Yoshimura, K., Tobe, T., Clarke,  
368 J.M., Topping, D.L., Suzuki, T., et al. (2011). Bifidobacteria can protect from enteropathogenic  
369 infection through production of acetate. *Nature* 469, 543-547.
- 370 9. Calderone, R.A., and Fonzi, W.A. (2001). Virulence factors of *Candida albicans*. *Trends*  
371 *Microbiol* 9, 327-335.
- 372 10. Mitchell, J. (2011). *Streptococcus mitis*: walking the line between commensalism and  
373 pathogenesis. *Mol Oral Microbiol* 26, 89-98.
- 374 11. Perrot-Minnot, M.J., Cheval, B., Migeon, A., and Navajas, M. (2002). Contrasting effects  
375 of *Wolbachia* on cytoplasmic incompatibility and fecundity in the haplodiploid mite *Tetranychus*  
376 *urticae*. *Journal of Evolutionary Biology* 15, 808-817.
- 377 12. Fleury, F., Vavre, F., Ris, N., Fouillet, P., and Bouletreau, M. (2000). Physiological cost  
378 induced by the maternally-transmitted endosymbiont *Wolbachia* in the *Drosophila* parasitoid  
379 *Leptopilina heterotoma*. *Parasitology* 121 Pt 5, 493-500.
- 380 13. Min, K.T., and Benzer, S. (1997). *Wolbachia*, normally a symbiont of *Drosophila*, can be  
381 virulent, causing degeneration and early death. *Proc Natl Acad Sci U S A* 94, 10792-10796.
- 382 14. Koehncke, A., Telschow, A., Werren, J.H., and Hammerstein, P. (2009). Life and death of  
383 an influential passenger: *Wolbachia* and the evolution of CI-modifiers by their hosts. *PLoS One* 4,  
384 e4425.
- 385 15. Hornett, E.A., Charlat, S., Duplouy, A.M., Davies, N., Roderick, G.K., Wedell, N., and  
386 Hurst, G.D. (2006). Evolution of male-killer suppression in a natural population. *PLoS Biol* 4,  
387 e283.
- 388 16. Jaenike, J. (2009). Coupled population dynamics of endosymbionts within and between hosts. *Oikos*  
389 118, 353-362.

17. Funkhouser, L.J., and Bordenstein, S.R. (2013). Mom knows best: the universality of maternal microbial transmission. *PLoS Biol* *11*, e1001631.
18. Wang, J., Wu, Y., Yang, G., and Aksoy, S. (2009). Interactions between mutualist *Wigglesworthia* and tsetse peptidoglycan recognition protein (PGRP-LB) influence trypanosome transmission. *Proc Natl Acad Sci U S A* *106*, 12133-12138.
19. Login, F.H., Balmand, S., Vallier, A., Vincent-Monegat, C., Vigneron, A., Weiss-Gayet, M., Rochat, D., and Heddi, A. (2011). Antimicrobial peptides keep insect endosymbionts under control. *Science* *334*, 362-365.
20. Serbus, L.R., Ferreccio, A., Zhukova, M., McMorris, C.L., Kiseleva, E., and Sullivan, W. (2011). A feedback loop between *Wolbachia* and the *Drosophila* *gurken* mRNP complex influences *Wolbachia* titer. *J Cell Sci* *124*, 4299-4308.
21. Newton, I.L., Savitsky, O., and Sheehan, K.B. (2015). *Wolbachia* utilize host actin for efficient maternal transmission in *Drosophila melanogaster*. *PLoS pathogens* *11*, e1004798.
22. Campbell, B.C., Steffen-Campbell, J.D., and Werren, J.H. (1993). Phylogeny of the *Nasonia* species complex (Hymenoptera: Pteromalidae) inferred from an internal transcribed spacer (ITS2) and 28S rDNA sequences. *Insect molecular biology* *2*, 225-237.
23. Raychoudhury, R., Desjardins, C.A., Buellesbach, J., Loehlin, D.W., Grillenberger, B.K., Beukeboom, L., Schmitt, T., and Werren, J.H. (2010). Behavioral and genetic characteristics of a new species of *Nasonia*. *Heredity* *104*, 278-288.
24. Gadau, J., Page, R.E., and Werren, J.H. (2002). The genetic basis of the interspecific differences in wing size in *Nasonia* (Hymenoptera; Pteromalidae): major quantitative trait loci and epistasis. *Genetics* *161*, 673-684.

25. Loehlin, D.W., Enders, L.S., and Werren, J.H. (2010). Evolution of sex-specific wing shape at the widerwing locus in four species of *Nasonia*. *Heredity* *104*, 260-269.
26. Loehlin, D.W., Oliveira, D.C., Edwards, R., Giebel, J.D., Clark, M.E., Cattani, M.V., van de Zande, L., Verhulst, E.C., Beukeboom, L.W., Munoz-Torres, M., et al. (2010). Non-coding changes cause sex-specific wing size differences between closely related species of *Nasonia*. *PLoS genetics* *6*, e1000821.
27. Werren, J.H., Cohen, L.B., Gadau, J., Ponce, R., Baudry, E., and Lynch, J.A. (2015). Dissection of the complex genetic basis of craniofacial anomalies using haploid genetics and interspecies hybrids in *Nasonia* wasps. *Dev Biol*.
28. Niehuis, O., Bullesbach, J., Judson, A.K., Schmitt, T., and Gadau, J. (2011). Genetics of cuticular hydrocarbon differences between males of the parasitoid wasps *Nasonia giraulti* and *Nasonia vitripennis*. *Heredity* *107*, 61-70.
29. Niehuis, O., Buellesbach, J., Gibson, J.D., Pothmann, D., Hanner, C., Mutti, N.S., Judson, A.K., Gadau, J., Ruther, J., and Schmitt, T. (2013). Behavioural and genetic analyses of *Nasonia* shed light on the evolution of sex pheromones. *Nature* *494*, 345-348.
30. Hoedjes, K.M., Smid, H.M., Vet, L.E., and Werren, J.H. (2014). Introgression study reveals two quantitative trait loci involved in interspecific variation in memory retention among *Nasonia* wasp species. *Heredity (Edinb)* *113*, 542-550.
31. Raychoudhury, R., Baldo, L., Oliveira, D.C., and Werren, J.H. (2009). Modes of acquisition of *Wolbachia*: horizontal transfer, hybrid introgression, and codivergence in the *Nasonia* species complex. *Evolution* *63*, 165-183.
32. Zug, R., and Hammerstein, P. (2012). Still a host of hosts for *Wolbachia*: analysis of recent data suggests that 40% of terrestrial arthropod species are infected. *PLoS One* *7*, e38544.

33. Weinert, L.A., Araujo-Jnr, E.V., Ahmed, M.Z., and Welch, J.J. (2015). The incidence of bacterial endosymbionts in terrestrial arthropods. *Proc Biol Sci* 282, 20150249.
34. Werren, J.H., Baldo, L., and Clark, M.E. (2008). *Wolbachia*: master manipulators of invertebrate biology. *Nat Rev Microbiol* 6, 741-751.
35. Serbus, L.R., Casper-Lindley, C., Landmann, F., and Sullivan, W. (2008). The genetics and cell biology of *Wolbachia*-host interactions. *Annual review of genetics* 42, 683-707.
36. Perrot-Minnot, M.J., and Werren, J.H. (1999). *Wolbachia* infection and incompatibility dynamics in experimental selection lines. *J Evol Biol* 12, 272-282.
37. Dyer, K.A., Minhas, M.S., and Jaenike, J. (2005). Expression and modulation of embryonic male-killing in *Drosophila innubila*: opportunities for multilevel selection. *Evolution* 59, 838-848.
38. McGraw, E.A., Merritt, D.J., Droller, J.N., and O'Neill, S.L. (2002). *Wolbachia* density and virulence attenuation after transfer into a novel host. *Proc Natl Acad Sci U S A* 99, 2918-2923.
39. McMeniman, C.J., Lane, R.V., Cass, B.N., Fong, A.W., Sidhu, M., Wang, Y.F., and O'Neill, S.L. (2009). Stable introduction of a life-shortening *Wolbachia* infection into the mosquito *Aedes aegypti*. *Science* 323, 141-144.
40. Suh, E., Mercer, D.R., Fu, Y., and Dobson, S.L. (2009). Pathogenicity of life-shortening *Wolbachia* in *Aedes albopictus* after transfer from *Drosophila melanogaster*. *Applied and environmental microbiology* 75, 7783-7788.
41. Le Clec'h, W., Braquart-Varnier, C., Raimond, M., Ferdy, J.B., Bouchon, D., and Sicard, M. (2012). High virulence of *Wolbachia* after host switching: when autophagy hurts. *PLoS pathogens* 8, e1002844.

42. Kim, J.K., Kim, N.H., Jang, H.A., Kikuchi, Y., Kim, C.H., Fukatsu, T., and Lee, B.L. (2013). Specific midgut region controlling the symbiont population in an insect-microbe gut symbiotic association. *Applied and environmental microbiology* 79, 7229-7233.
43. Login, F.H., and Heddi, A. (2013). Insect immune system maintains long-term resident bacteria through a local response. *J Insect Physiol* 59, 232-239.
44. Mouton, L., Henri, H., Bouletreau, M., and Vavre, F. (2003). Strain-specific regulation of intracellular Wolbachia density in multiply infected insects. *Molecular ecology* 12, 3459-3465.
45. Kondo, N., Shimada, M., and Fukatsu, T. (2005). Infection density of Wolbachia endosymbiont affected by co-infection and host genotype. *Biology letters* 1, 488-491.
46. Rio, R.V., Wu, Y.N., Filardo, G., and Aksoy, S. (2006). Dynamics of multiple symbiont density regulation during host development: tsetse fly and its microbial flora. *Proc Biol Sci* 273, 805-814.
47. Chafee, M.E., Zecher, C.N., Gourley, M.L., Schmidt, V.T., Chen, J.H., Bordenstein, S.R., and Clark, M.E. (2011). Decoupling of host-symbiont-phage coadaptations following transfer between insect species. *Genetics* 187, 203-215.
48. Bian, G., Zhou, G., Lu, P., and Xi, Z. (2013). Replacing a native Wolbachia with a novel strain results in an increase in endosymbiont load and resistance to dengue virus in a mosquito vector. *PLoS Negl Trop Dis* 7, e2250.
49. Le Clec'h, W., Raimond, M., Guillot, S., Bouchon, D., and Sicard, M. (2013). Horizontal transfers of feminizing versus non-feminizing Wolbachia strains: from harmless passengers to pathogens. *Environ Microbiol.*

50. Desjardins, C.A., Gadau, J., Lopez, J.A., Niehuis, O., Avery, A.R., Loehlin, D.W., Richards, S., Colbourne, J.K., and Werren, J.H. (2013). Fine-scale mapping of the *Nasonia* genome to chromosomes using a high-density genotyping microarray. *G3* 3, 205-215.
51. Lander, E.S., and Botstein, D. (1989). Mapping mendelian factors underlying quantitative traits using RFLP linkage maps. *Genetics* 121, 185-199.
52. Lynch, J.A., Brent, A.E., Leaf, D.S., Pultz, M.A., and Desplan, C. (2006). Localized maternal orthodenticle patterns anterior and posterior in the long germ wasp *Nasonia*. *Nature* 439, 728-732.
53. Lynch, J.A., Olesnick, E.C., and Desplan, C. (2006). Regulation and function of *tailless* in the long germ wasp *Nasonia vitripennis*. *Dev Genes Evol* 216, 493-498.
54. Ozuak, O., Buchta, T., Roth, S., and Lynch, J.A. (2014). Dorsoventral polarity of the *Nasonia* embryo primarily relies on a BMP gradient formed without input from Toll. *Curr Biol* 24, 2393-2398.
55. Ozuak, O., Buchta, T., Roth, S., and Lynch, J.A. (2014). Ancient and diverged TGF-beta signaling components in *Nasonia vitripennis*. *Dev Genes Evol* 224, 223-233.
56. Lynch, J.A., and Desplan, C. (2010). Novel modes of localization and function of *nanos* in the wasp *Nasonia*. *Development* 137, 3813-3821.
57. Verhulst, E.C., Beukeboom, L.W., and van de Zande, L. (2010). Maternal control of haplodiploid sex determination in the wasp *Nasonia*. *Science* 328, 620-623.
58. Werren, J.H., and Loehlin, D.W. (2009). The parasitoid wasp *Nasonia*: an emerging model system with haploid male genetics. *Cold Spring Harb Protoc* 2009, pdb emo134.



59. Liang, H., Zhou, W., and Landweber, L.F. (2006). SWAKK: a web server for detecting positive selection in proteins using a sliding window substitution rate analysis. *Nucleic Acids Res* 34, W382-384.
60. Alende, N., Nielsen, J.E., Shields, D.C., and Khaldi, N. (2011). Evolution of the isoelectric point of mammalian proteins as a consequence of indels and adaptive evolution. *Proteins* 79, 1635-1648.
61. Ferree, P.M., Frydman, H.M., Li, J.M., Cao, J., Wieschaus, E., and Sullivan, W. (2005). Wolbachia utilizes host microtubules and Dynein for anterior localization in the *Drosophila* oocyte. *PLoS pathogens* 1, e14.
62. Bordenstein, S.R., Marshall, M.L., Fry, A.J., Kim, U., and Wernegreen, J.J. (2006). The tripartite associations between bacteriophage, Wolbachia, and arthropods. *PLoS pathogens* 2, e43.
63. Bordenstein, S.R., and Bordenstein, S.R. (2011). Temperature affects the tripartite interactions between bacteriophage WO, Wolbachia, and cytoplasmic incompatibility. *PLoS One* 6, e29106.
64. Broman, K.W., Wu, H., Sen, S., and Churchill, G.A. (2003). R/qtl: QTL mapping in experimental crosses. *Bioinformatics* 19, 889-890.
65. Robinson, M.D., McCarthy, D.J., and Smyth, G.K. (2010). edgeR: a Bioconductor package for differential expression analysis of digital gene expression data. *Bioinformatics* 26, 139-140.
66. Livak, K.J., and Schmittgen, T.D. (2001). Analysis of relative gene expression data using real-time quantitative PCR and the 2<sup>-</sup>(-Delta Delta C(T)) Method. *Methods* 25, 402-408.
67. Pultz, M.A., Westendorf, L., Gale, S.D., Hawkins, K., Lynch, J., Pitt, J.N., Reeves, N.L., Yao, J.C., Small, S., Desplan, C., et al. (2005). A major role for zygotic hunchback in patterning the *Nasonia* embryo. *Development* 132, 3705-3715.

521 68. Kumar, S., Stecher, G., and Tamura, K. (2016). MEGA7: Molecular Evolutionary Genetics  
522 Analysis Version 7.0 for Bigger Datasets. *Mol Biol Evol* 33, 1870-1874.

523 69. Guindon, S., Dufayard, J.F., Lefort, V., Anisimova, M., Hordijk, W., and Gascuel, O.  
524 (2010). New algorithms and methods to estimate maximum-likelihood phylogenies: assessing the  
525 performance of PhyML 3.0. *Syst Biol* 59, 307-321.

526 70. Huelsenbeck, J.P., and Ronquist, F. (2001). MRBAYES: Bayesian inference of  
527 phylogenetic trees. *Bioinformatics* 17, 754-755.

528 71. Letunic, I., and Bork, P. (2017). 20 years of the SMART protein domain annotation  
529 resource. *Nucleic Acids Res.*

530 72. Schindelin, J., Arganda-Carreras, I., Frise, E., Kaynig, V., Longair, M., Pietzsch, T.,  
531 Preibisch, S., Rueden, C., Saalfeld, S., Schmid, B., et al. (2012). Fiji: an open-source platform for  
532 biological-image analysis. *Nat Methods* 9, 676-682.

533

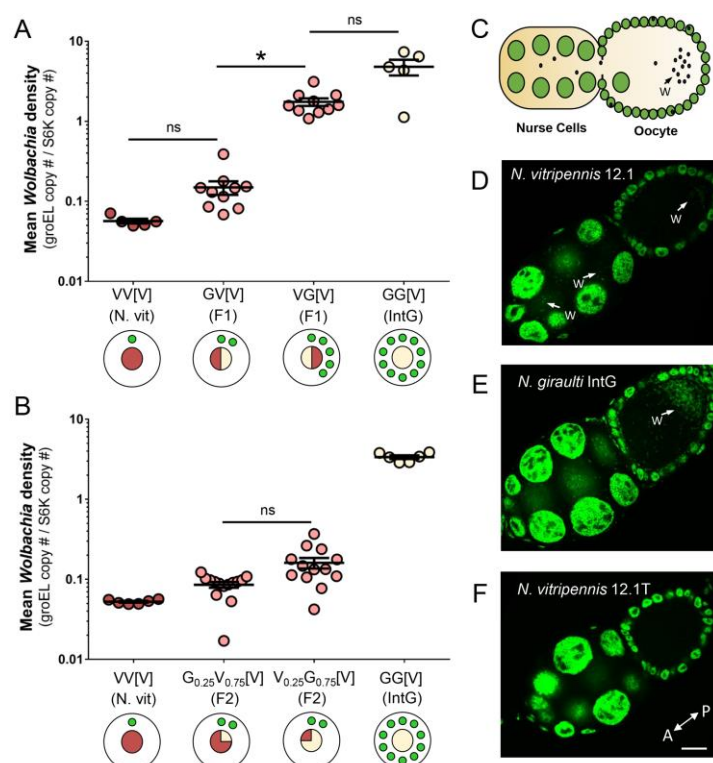

**Figure 1. Disparities in *wVitA* titers begin during oogenesis and are established through a maternal genetic effect.**

(A) *wVitA* densities in female pupae from parental *N. vitripennis*, *N. giraulti* IntG, and their reciprocal F1 hybrids.

(B) *wVitA* densities in F2 pupae from F1 females backcrossed to their paternal line. For each cross, genotype (male x female) is followed by cytotype in brackets (V = *N. vitripennis*, G = *N. giraulti*, number = estimated proportion of genotype). For the circle diagrams, the inner circle represents the expected percentage of the nuclear genome that is of *N. vitripennis* (red) or *N. giraulti* (cream) origin. Green circles represent *wVitA* load (not drawn to scale). Error bars represent mean  $\pm$  S.E.M.

\*p < 0.05, post-hoc Dunn's test.

(C) Diagram of a *Nasonia* egg chamber. Large green circles represent host nuclei and small black circles represent *Wolbachia*.

(D) Stage 3 egg chambers with host and *Wolbachia* DNA stained with SYTOX Green from *w*VitA-infected *N. vitripennis*.

(E) Stage 3 egg chambers with host and *Wolbachia* DNA stained with SYTOX Green from *w*VitA-infected *N. giraulti* IntG.

(F) Stage 3 egg chambers with host and *Wolbachia* DNA stained with SYTOX Green from uninfected *N. vitripennis*. Examples of *Wolbachia* cells are labeled with a “W” and white arrows.

A = anterior, P = posterior, Scale bar = 15  $\mu$ m.

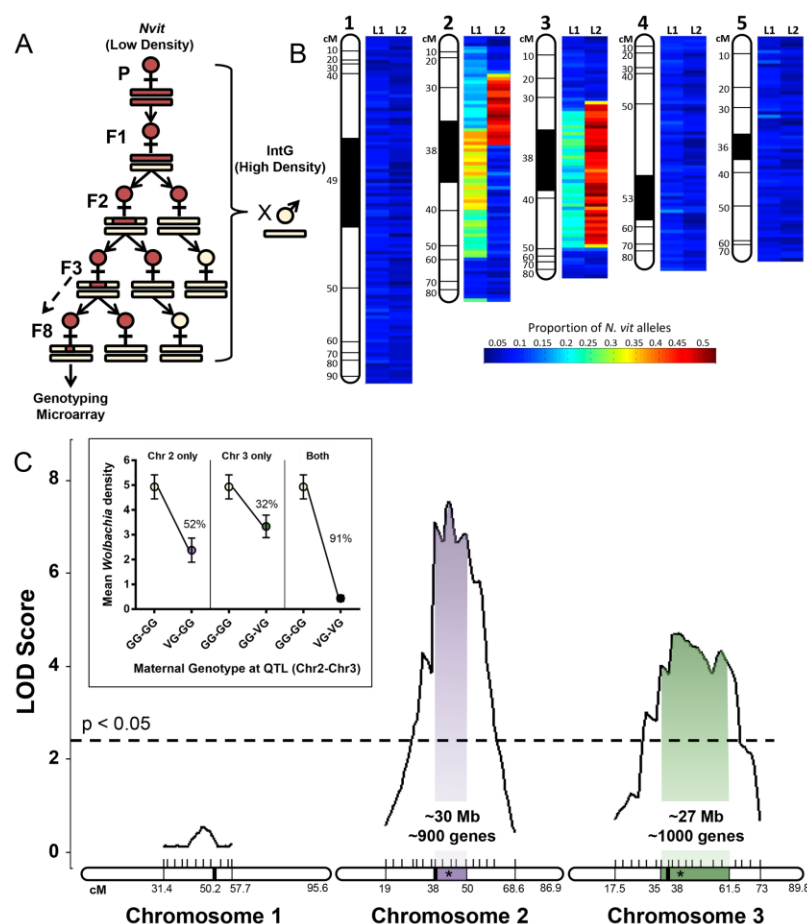

**Figure 2. Two genomic regions interact additively to suppress *w*VitA titers.**

(A) Schematic of introgression using density phenotype (red female = low, cream female = high) as proxy for maternal genotype (red bar = *N. vitripennis*, cream bar = *N. giraulti*). Eighth generation females with lowest embryonic *Wolbachia* densities were genotyped on a *Nasonia* microarray.

(B) Heatmap of the proportion of *N. vitripennis* alleles across the genome in a pool of three females from each introgression line (L1 or L2). The proportion of *N. vitripennis* alleles is scaled from 0 to 0.5, where 0 = no *N. vitripennis* alleles and 0.5 = all females were heterozygous. Areas were considered enriched for *N. vitripennis* alleles at  $\geq 0.2$ .

(C) Plot of LOD score after QTL mapping of F2 females. Shaded regions represent the 95% Bayes credible interval for significant QTL peaks (star). Dashed line represents genome-wide significance threshold at  $\alpha = 0.05$ .

(C, inset) *Wolbachia* density (mean  $\pm$  S.E.M) of offspring based on maternal genotype at each QTL peak (V = *N. vitripennis*, G = *N. giraulti*). Percent reduction in densities is compared to offspring of F2 homozygous *N. giraulti* females. All maps are based on the *Nasonia* genetic map [50].

See also Table S1.



mothers with the same haplotype. Error bars denote mean  $\pm$  S.E.M. See also Table S1 and Table S3.



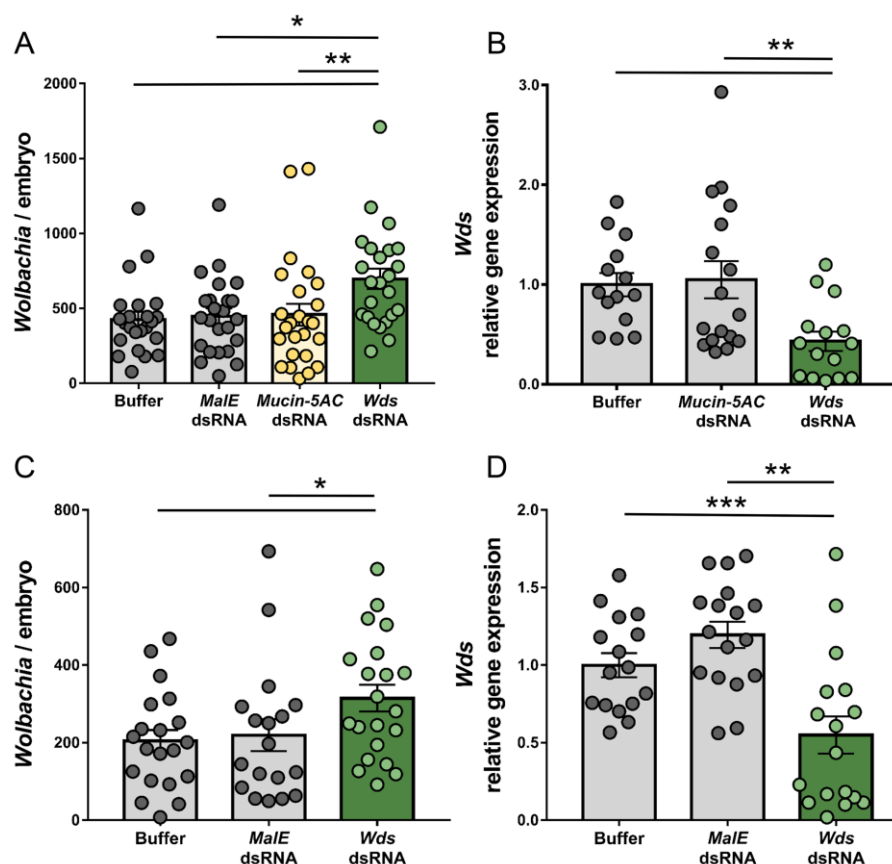

**Figure 4. The *N. vitripennis* allele of *Wds* suppresses densities of vertically-transmitted *Wolbachia*.**

(A) Number of *wVitA Wolbachia* per embryo from IntC3 females that were buffer-injected, injected with dsRNA against control genes *Male* or *Mucin-5AC*, or injected with dsRNA against *Wds*. \*p < 0.05 and \*\*p < 0.01 post-hoc Dunn's multiple comparisons test.

(B) Relative gene expression of *Wds* in late pupae of *Wds*-RNAi and *Mucin-5AC*-RNAi females normalized to *Wds* expression in buffer-injected females. \*\*p < 0.01, Mann-Whitney U test.

(C) Number of *wVitA Wolbachia* per embryo from R6-3 females that were buffer-injected, injected with dsRNA against control gene *Male* or injected with dsRNA against *Wds*. \*p < 0.05, Mann-Whitney U test.

(D) Relative gene expression of *Wds<sub>v</sub>* in late pupae of *Wds*-RNAi and *MalE*-RNAi females normalized to *Wds<sub>v</sub>* expression in buffer-injected females. \*\*p<0.01, \*\*\*p < 0.001, Mann-Whitney U test. All error bars represent mean ± S.E.M.

See also Figure S1, Figure S2, Table S2, and Table S3.

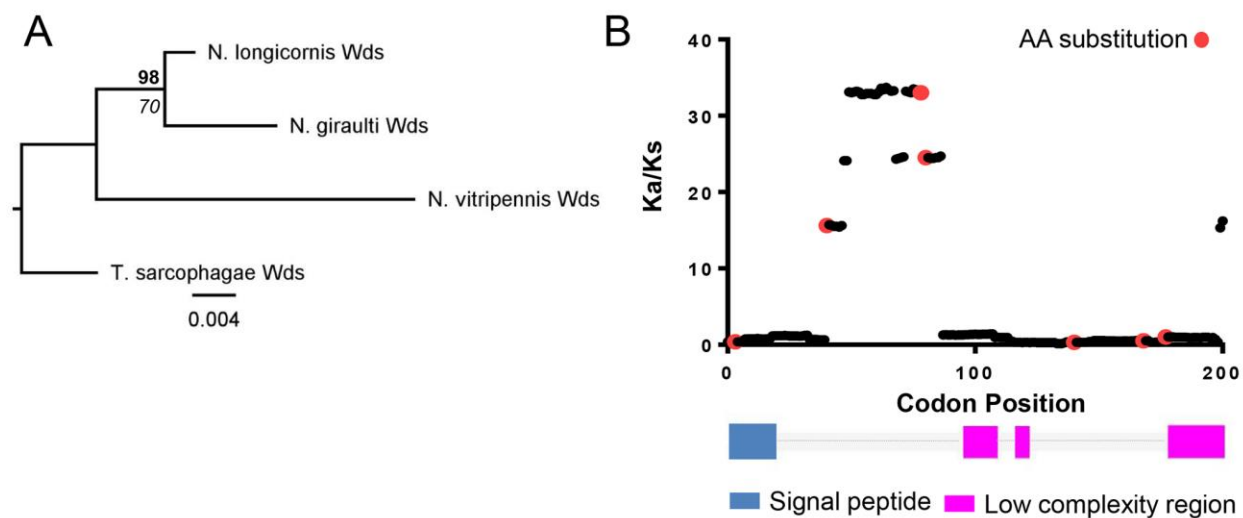

**Figure 5. The *N. vitripennis* allele of *Wds* is under positive selection.**

(A) Amino acid phylogeny of *Wds* across the *Nasonia* genus and *Trichomalopsis sarcophagae*.

Bold text above branch denotes Bayesian posterior probability. Italic text below branch denotes maximum likelihood bootstrap value. Scale bar denotes amino acid substitutions per site.

(B) Plot of Ka/Ks ratios based on a sliding window analysis across the *N. vitripennis* and *N.*

*giraulti* *Wds* coding sequences. Red circles indicate the locations of the seven amino acid

substitutions unique to *N. vitripennis* *Wds*. Diagram below illustrates location of the predicted

signal peptide and low complexity regions of the *Wds* protein.

See also Figure S3 and Table S4.

## STAR METHODS

### Contact for Reagent and Resource Sharing

Further information and requests for resources and reagents should be directed to and will be fulfilled by the Lead Contact, Seth R. Bordenstein (s.bordenstein@vanderbilt.edu).

### Experimental Model and Subject Details

#### Nasonia Parasitoid Wasps

Experiments were performed with *Nasonia vitripennis* strain 12.1, *N. giraulti* strain IntG12.1 or hybrids of these two species. *N. vitripennis* 12.1 is singly-infected with native *Wolbachia* strain *w*VitA and was derived from the double-infected *N. vitripennis* R511 (*w*VitA and *w*VitB) after a prolonged period of diapause [36]. *N. giraulti* strain IntG12.1 was generated by backcrossing *N. vitripennis* 12.1 females to uninfected *N. giraulti* Rv2x(u) males for nine generation [47], producing hybrids with an *N. giraulti* genome and an *N. vitripennis* cytoplasm harboring *w*VitA. All *Nasonia* were reared at 25°C in constant light on *Sarcophaga bullata* fly hosts reared in house on bovine liver from Walnut Hills Farm.

### Method Details

#### Quantitative analysis of *Wolbachia* densities

Genomic DNA was extracted from pupae or adult *Nasonia* using the Gentra Puregene Tissue Kit (Qiagen) according to the manufacturer's protocol. Real-time quantitative PCR (qPCR) was performed on a CFX96 Real-Time system (Bio-Rad) using a total reaction volume of 25 µl: 12.5 µl of iQ SYBR Green Supermix (Bio-Rad), 8.5 µl of sterile water, 1.0 µl each of 5 µM forward and reverse primers, and 2 µl of target DNA in single wells of a 96-well plate (Bio-Rad). All qPCR

reactions were performed in technical duplicates and included a melt curve analysis to check for primer dimers and nonspecific amplification. Selective amplification was performed using primers previously described for the *Wolbachia groEL* gene [62] and *Nasonia NvS6K* gene [63]. Standard curves for each gene were constructed as previously described [63] using a log<sub>10</sub> dilution series of larger PCR products of known concentrations for each gene. *groEL* and *S6K* copy numbers for each sample were calculated based on the following standard curve equations: *groEL*:  $y = -3.367x + 35.803$  and *S6K*:  $y = -3.455x + 35.908$ , where  $y$  = averaged Ct value between technical duplicates and  $x$  = log starting quantity of template DNA. *Wolbachia* density was calculated by dividing *groEL* copy number by *S6K* copy number for each sample. Since diploid female *Nasonia* have twice the number of *S6K* copies than males, all experiments comparing *Wolbachia* densities were performed on either all male or all female samples to eliminate *S6K* copy number as a confounding factor in the statistical analyses.

#### Microsatellite marker genotyping

Primers used to amplify microsatellite markers that differ in size between *N. vitripennis* and *N. giraulti* are listed in Table S1. Microsatellite markers not previously published were identified by aligning *N. vitripennis* and *N. giraulti* genomic sequences using the Geneious alignment tool in Geneious Pro v5.5.8 (Biomatters). The Geneious primer design tool was then used to generate primer sets spanning each microsatellite. All PCR reactions were run on a Veriti Thermal Cycler (Applied Biosystems) with a total reaction volume of 15 µl: 7.5 µl of GoTaq Green Master Mix (Promega), 3.6 µl of sterile water, 1.2 µl of 5µM forward and reverse primers (see Table S1 for annealing temp.), and 1.5 µl of target DNA. PCR products were run on 4% agarose gels in TBE buffer (Sigma) at 90 volts for 2.5 to 6 hours, stained with GelRed (Biotium) according to

manufacturer's protocol, and imaged on a Red Personal Gel Imager (Alpha Innotech). New markers were validated based on predicted band size using *N. vitripennis* 12.1 and *N. giraulti* IntG as controls.

# Phenotype-based selection and introgression coupled with a genotyping microarray

*N. vitripennis* females (low *w*VitA density) were backcrossed with *N. giraulti* IntG males (high *w*VitA density) for nine generations. For each generation of backcrossing, five female pupal offspring were pooled from each hybrid mother, and the pupal *Wolbachia* densities were measured using qPCR. Sisters of the pupae with the lowest *Wolbachia* densities were then used as mothers in the next round of backcrossing. Two independent selection lines were maintained simultaneously along with control lines of pure-breeding *N. vitripennis* and *N. giraulti*. After eight generations of selection, the three females from each introgression line that produced ninth-generation offspring with the lowest *Wolbachia* densities were pooled and their DNA extracted using the DNeasy Blood and Tissue Kit (Qiagen) with the protocol for purification of DNA from insects. To obtain enough DNA for microarray hybridization, we used the REPLI-g Mini Kit (Qiagen) with the protocol for 5 µl of DNA template to amplify genomic DNA overnight at 30 °C, then purified the DNA using ethanol precipitation. The final concentration for each sample was diluted to 1 µg/µl and a total of 10 µl was sent to The Center for Genomics and Bioinformatics at Indiana University to be processed on a *Nasonia* genotyping microarray (Roche NimbleGen) tiled with probes for 19,681 single nucleotide polymorphisms and indels that differ between *N. vitripennis* and *N. giraulti* [50].

For each sample, the proportion of *N. vitripennis* alleles at each marker was determined based on the ratio of hybridization to the *N. vitripennis*-specific probe versus hybridization to the *N.*

*giraulti*-specific probe, as previously described [50]. To verify species-specificity of these markers for our *Nasonia* strains, we also genotyped *N. vitripennis* 12.1 and *N. giraulti* IntG control females on the array, and markers that did not display the correct specificity within one standard deviation of the median were removed from subsequent analyses (5,301 markers total). The remaining markers were then manually mapped back to the most recent *Nasonia* linkage map [50]. Since all introgression females received one copy of their diploid genome from their *N. giraulti* father, the theoretical maximum proportion of *N. vitripennis* alleles at each marker cluster for experimental samples is 0.5. The proportion of *N. vitripennis* alleles was averaged for every 22 consecutive markers across each chromosome, and heat maps were generated using the HeatMap function in MATLAB (MathWorks).

## QTL Analysis

F2 hybrid females (N = 191) were generated by backcrossing F1 *N. vitripennis*/*N. giraulti* hybrids to *N. giraulti* IntG males. F2 females were then backcrossed again to *N. giraulti* IntG and allowed to lay offspring. Five female pupae from each F2 female were pooled and their *Wolbachia* densities measured using qPCR. Females that produced offspring with densities within the highest and lowest quartile of the density distribution (N = 42 for each quartile) were selectively genotyped with 47 microsatellite markers spread across chromosomes 1, 2 and 3 with an average distance of 3 cM between markers. Phenotypic information for all 191 F2 females was included in the mapping analyses to prevent inflation of QTL effects due to the biased selection of extreme phenotypes [51]. QTL analyses were performed in R (version 3.0.2) with package R/qtl [64]. Significance thresholds for our dataset were calculated by using a stratified permutation test with the scanone function (1000 permutations). To identify significant QTL and their interactions, we first

conducted a one-dimensional, one-QTL scan and a two-dimensional, two-QTL scan using the EM algorithm with a step size of 1 cM and an assumed genotype error probability of 0.001. Two significant QTLs were identified, one each on chromosomes 2 and 3, which were predicted to act additively. The positions of identified QTL were then refined using multiple QTL modeling with the multiple imputation algorithm (200 imputations, step size = 1 cM) assuming a model with two additive QTLs. 95% Bayes credible intervals were calculated for each QTL after multiple QTL modeling using the bayesint function.

### Marker-assisted segmental introgressions

Marker-assisted segmental introgression lines were generated by repeatedly backcrossing hybrid females to *N. giraulti* males for nine generations while selecting for *N. vitripennis* alleles at three microsatellite markers on chromosome 3 (MM3.17, NvC3-18, and MM3.37). After the ninth generation, families that maintained an *N. vitripennis* allele at one or more of these markers were selected, and siblings were mated to each other to produce lines containing homozygous *N. vitripennis* regions at and around the markers. Individual adult females from each segmental line were genotyped and phenotyped separately (N = 10 – 15 females per line). Females were hosted as virgins, five male pupal offspring per female were pooled, and pupal *Wolbachia* densities were measured using qPCR. Variation across plates for a single experiment was reduced by including a set of parental DNA controls on all plates. The parental fold-change was then calculated by dividing the average *N. giraulti* control density by the average *N. vitripennis* control density. To calculate the sample fold-change, the absolute density for each sample was divided by the average density of the *N. vitripennis* control. To determine how “effective” each segmental introgression



line was at reducing densities, we calculated the percent effect on density suppression for each sample using the following equation:

$$\% \text{ effect on density suppression} = \left( 1 - \frac{\text{sample fold change}}{\text{parental fold change}} \right) \times 100$$

Each female was genotyped with markers across the region of interest, all females with identical genotypes across all markers were grouped together, and their percent effects on density suppression were averaged.

For the two subsequent rounds of introgression lines (R1 to R10 and R6-1 to R6-3), 300 IntC3 line females or 800 R6 line virgin females, respectively, were backcrossed to IntG males. The resulting virgin F1 females produced haploid, recombinant males. These recombinant males were mated to IntG females to produce heterozygous female offspring with the recombinant genotype. Siblings were then mated to each other and genotyped for two more generations to produce recombinant lines containing homozygous *N. vitripennis* introgressed regions reduced in size.

A subset of the genes within the 32-gene candidate region were genotyped using sequencing primers (Table S5) to amplify PCR products 250-750 bp for each of the R6 recombinant lines (R6-1 to R6-3) for Sanger sequencing (GENEWIZ). All PCR reactions were run on a Veriti Thermal Cycler (Applied Biosystems) with a total reaction volume of 15 µl: 7.5 µl of GoTaq Green Master Mix (Promega), 3.6 µl of sterile water, 1.2 µl of 5µM forward and reverse primers (see Table S5 for annealing temp.), and 1.5 µl of target DNA and purified using the QIAquick PCR Purification kit (Qiagen). At least 6 distinct single nucleotide polymorphisms (SNPs) between *N. vitripennis* and *N. giraulti* alleles were used to characterize the allele for each recombinant line using Geneious Pro v5.5.8 (Biomatters).

## RNA-seq of ovaries

One-day old females from *Nasonia* strains *N. vitripennis* 12.1, *N. giraulti* IntG, and *N. vitripennis/N. giraulti* introgression line IntC3 were hosted as virgins on *S. bullata* pupae for 48 hours to stimulate feeding and oogenesis. Females were then dissected in RNase-free 1X PBS buffer, and their ovaries were immediately transferred to RNase-free Eppendorf tubes in liquid nitrogen. Forty ovaries were pooled for each replicate and 4-5 biological replicates were collected per *Nasonia* strain. Ovaries were manually homogenized with RNase-free pestles, and their RNA was extracted using the Nucleospin RNA/Protein Kit (Macherey-Nagel) according to the manufacturer's protocol for purification of total RNA from animal tissues. After RNA purification, samples were treated with RQ1 RNase-free DNase (Promega) for 1 hour at 37 °C, followed by an ethanol precipitation with 1/10<sup>th</sup> volume 3M sodium acetate and 3 volumes 100% ethanol incubated overnight at -20 °C. PCR of samples with *Nasonia* primers NvS6KQTF4 and NVS6KQTR4 [63] revealed some residual DNA contamination, so DNase treatment and ethanol precipitation were repeated. After the second DNase treatment, PCR with the same primer set confirmed absence of contaminating DNA. Sample RNA concentrations were measured with a Qubit 2.0 Fluorometer (Life Technologies) using the RNA HS Assay kit (Life Technologies). All samples were run multiplexed on two lanes of the Illumina HiSeq3000 (paired-end, 150 bp reads, ~30M reads) at Vanderbilt's VANTAGE sequencing core. Raw reads were trimmed and mapped to the *N. vitripennis* genome Nvit\_2.1 (GCF\_000002325.3) in CLC Genomics Workbench 8.5.1, allowing ten gene hits per read using a minimum length fraction of 0.9 and a minimum similarity fraction of 0.9. The number of reads generated for each sample and the percentage of reads that mapped to the *N. vitripennis* genic and intergenic regions are provided in Table S2. Significant

differential gene expression was determined in CLC Genomics Workbench 8.5.1 at  $\alpha = 0.05$  for unique gene reads using the Empirical analysis of DGE tool, which is based on the edgeR program commonly used for gene expression analyses [65].

# RT-qPCR validation of RNA-seq results

One-day old females from *N. vitripennis* 12.1, *N. giraulti* IntG, and IntC3 were hosted with two *S. bullata* pupae and honey to encourage ovary development. After 48 hours, ovaries were removed in RNase-free PBS, flash-frozen in liquid nitrogen then stored at -80 °C. 4-5 replicates of fifty ovaries per replicate were collected for each *Nasonia* strain. Total RNA was extracted from each sample using Trizol reagent (Invitrogen) with the Direct-zol RNA Miniprep kit (Zymo Research) then treated with the DNA-free DNA Removal kit (Ambion) for one hour at 37 °C. After ensuring with PCR that all DNA had been removed, RNA was converted to cDNA using the SuperScript VILO cDNA Synthesis kit (Invitrogen).

RT-qPCR was performed on a CFX96 Real-Time system (Bio-Rad) using a total reaction volume of 25 µl: 12.5 µl of iTaq Universal SYBR Green Supermix (Bio-Rad), 8.5 µl of sterile water, 1 µl each of 5 µM forward and reverse primers (see STAR Methods), and 2 µl of target cDNA in single wells of a 96-well plate (Bio-Rad). All RT-qPCR reactions were performed in technical duplicates and included a melt curve analysis to check for nonspecific amplification. The 60S ribosomal protein L32 (also known as RP49) was used as an expression control. All primers for RT-qPCR are provided in the STAR Methods. Expression values for each candidate gene were calculated using the  $\Delta\Delta C_t$  method of relative quantification [66] with RP49 as the reference gene. Fold-change was determined by normalizing expression values to the mean expression value of *N. giraulti* IntG for each gene.

874

# 875 RNAi of candidate genes

876 To generate DNA template for dsRNA synthesis, primers with a T7 promoter sequence on  
877 the 5' end of each primer were used to amplify a 450-700 bp region of the targeted genes (see  
878 STAR Methods) by PCR using *N. vitripennis* whole-body cDNA as template. PCR amplicons were  
879 separated by electrophoresis on a 1% agarose gel, excised, and purified using the QIAquick Gel  
880 Extraction kit (Qiagen). The purified PCR products were used as template for a second PCR  
881 reaction with the same gene-specific T7 primers, then purified using the QIAquick PCR  
882 Purification kit (Qiagen). After quantification with the Qubit dsDNA Broad Range Assay kit  
883 (Thermo Fisher Scientific), approximately 1 ug of the purified PCR amplicon was used as template  
884 for dsRNA synthesis with the MEGAScript RNAi kit (Ambion). The dsRNA synthesis reaction  
885 was incubated for six hours at 37 °C, treated with RNase and DNase for one hour at 37 °C, then  
886 column-purified according to the manufacturer's protocol.

887 For injection, the dsRNA was used at a final concentration standardized to 750 ng/ul dsRNA.  
888 A Nanoject II (Drummond Scientific) was used to inject 23 nl of dsRNA (or MEGAScript kit  
889 elution buffer) into the ventral abdomen of female *Nasonia* at the yellow pupal stage. After  
890 emerging as adults, injected females were given honey and hosted individually on two *S. bullata*  
891 pupae for 48 hours. On the third day after emergence, they were transferred to new vials where  
892 they were presented with a single *S. bullata* host. After five hours, the hosts were opened and up  
893 to ten embryos were collected in a 1.5 ml Eppendorf tube for each female and stored at -80 °C.  
894 The females were given two hosts overnight, and then the same process was repeated again on the  
895 fourth day.

The number of *Wolbachia* cells per embryo from injected females three and four days post emergence was determined using qPCR with *Wolbachia groEL* primers as described above. *Wolbachia* titers were not normalized to *Nasonia* gene copy number because early embryos have varying numbers of genome copies depending on how many rounds of mitotic division they have undergone [67]. To determine the knock-down efficiency of each dsRNA injection, RNA extraction and RT-qPCR of black pupae, five days post injection, were performed with 14-17 biological replicates from each treatment group as described above using the gene-specific qPCR primers in the STAR Methods.

# Wds evolution and domain analyses

*N. giraulti* and *N. longicornis* nucleotide sequences of *Wds* were obtained from NCBI genomic scaffold sequences GL276173 and GL277955, respectively, and indels were manually extracted in Geneious Pro v11.0.3 (Biomatters) based on homology to *N. vitripennis* gene LOC1006079092. Protein alignment of *Wds* amino acid sequences for the three *Nasonia spp.* and its homolog in *T. sarcophagae* (TSAR\_005991) was performed using the Geneious alignment tool. MEGA7.0.26 [68] was used to identify the JTT model as the best model of protein evolution for the alignment based on corrected Akaike information criterion (AICc). PhyML [69] and MrBayes [70] were executed in Geneious with default parameters to construct a maximum likelihood tree with bootstrapping and a Bayesian tree with a burn-in of 100,000, respectively.

To identify residues under positive selection in *Wds*, Ka/Ks values were calculated based on a pairwise alignment of the *N. vitripennis* and *N. giraulti* *Wds* coding sequences using a sliding window analysis (window = 30 AA, step size = 1 AA, Standard Code for genetic code input) in the SWAKK bioinformatics web server [59]. Analysis of *Wds* for protein structures and conserved

domains was performed using the SMART online software at <http://smart.embl-heidelberg.de> [71]. Protein pIs were predicted using the online ExPASy Compute pI/Mw tool.

### Staining Wolbachia in Nasonia ovaries

Female *Nasonia* were hosted on *Sarcophaga bullata* pupae for two to three days before dissection to encourage ovary development. For nuclear staining of ovaries, females were dissected in 1X phosphate-buffered saline (PBS) solution, where ovaries were removed with forceps and individual ovarioles were separated with fine needles. Ovaries were fixed in 4% formaldehyde in PBS with 0.2% Triton X-100 (PBST) for 20 minutes at room temperature then transferred to a 1.5 ml Eppendorf tube containing PBST. Samples were washed quickly three times with PBST then incubated in PBST plus 1 mg/ml RNase A for three hours at room temperature then overnight at 4 °C. After removing the RNase A solution, ovaries were incubated at room temperature for 15 minutes in PBST with 1:300 SYTOX green nucleic acid stain (Thermo Fisher Scientific) before washing twice with PBST, 15 minutes each time. Ovaries were then transferred to a glass slide and mounted in ProLong Gold antifade solution (Thermo Fisher Scientific) and covered with a glass cover slip sealed with nail polish.

All images were acquired on a Zeiss LSM 510 META inverted confocal microscope at the Vanderbilt University Medical Center Cell Imaging Shared Resource core and processed with Fiji software [72].

### **Quantification and Statistical Analyses**

All statistical analyses, unless otherwise noted, were performed in GraphPad Prism 6.07 (GraphPad Software, La Jolla, CA). Outliers were removed from the results on embryonic

*Wolbachia* titers and *Wds* RT-qPCR using the ROUT method, Q=1%. Non-parametric tests were used on all data since most data did not pass a Shapiro-Wilk test for normality or sample sizes were too small. Mann-Whitney U tests were used for comparisons between two groups, whereas a Kruskal-Wallis test was used to compare multiple groups. If the Kruskal-Wallis test was significant ( $p \leq 0.05$ ), a post-hoc Dunn's test of multiple comparisons was used to calculate significance for all pair-wise combinations within the group. All averages are reported as mean  $\pm$  S.E.M. For all quantifications of pupal *Wolbachia* densities, sample size "N" represents one pool of five pupae. For any data referring to adult *Nasonia* (genotyping, RNAi or RT-qPCR), sample size "N" denotes individual *Nasonia*.

# **Data and Software Availability**

RNA-seq data generated in this study will be available in the Sequence Reads Archive.

955 **SUPPLEMENTAL INFORMATION**

956 Supplemental Information includes three figures, five tables and two datasets.

957 **Data S1. QTL genotypes and phenotypes, Related to Figure 2.**

958 V/G = heterozygous female (red), G/G = homozygous *N. giraulti* female (cream), and question  
 959 marks indicate an unknown genotype. Markers that fall within the 95% Bayes credible interval are  
 960 highlighted in purple (chromosome two) or green (chromosome three).

961 **Data S2. Chromosome 3 segmental introgression haplotypes and their effects on *w*VitA**  
 962 **density suppression, Related to Figure 3.**

963 cM locations based on genetic linkage map from [50].
